# Supplementary material
Source: Royal Society of Chemistry journal article supplement (doi:10.1039/d6nj00950f)
Supplement: d6nj00950f1.pdf [file d6nj00950f1.pdf]

## Supplementary Information

### Nickel-doped copper oxide nanoparticle synthesized by co-precipitation method for efficient electrocatalytic synthesis of ammonia from nitrate

#### 1. Experimental Procedures

##### Determination of NH<sub>3</sub>

The concentration of ammonia was obtained by using the indophenol blue method in combination with the colorimetric method. To measure the content of NH<sub>3</sub> in the electrolyte after the NO<sub>3</sub><sup>-</sup> reduction reaction, Take 1 ml of the electrolyte from the cathode chamber and add it to a 10 ml centrifuge tube, add deionized water to make the volume reach 10 ml, dilute it 10 times, then take 1 ml of the diluted 10-fold solution. Next, add a certain amount of 0.05 M H<sub>2</sub>SO<sub>4</sub> solution to the centrifuge tube to make the solution pH close to neutral, and then make the volume reach 10 ml. Obtain the diluted electrolyte solution 100 times its original volume, and then take 1 ml of the diluted electrolyte solution 100 times its original volume and place it in a centrifuge tube, Then, 1 ml of salicylic acid (composed of 40 ml of deionized water, 2 grams of salicylic acid, 2 grams of sodium citrate, and 1.6 grams of NaOH), 0.1 ml of sodium nitroprusside (composed of 10 ml of deionized water and 0.1 gram of sodium nitroprusside), and 0.1 ml of sodium hypochlorite (composed of 10 ml of deionized water, 5 ml of 6-14% sodium hypochlorite, and 0.8 grams of NaOH) were added successively. The solution was then made up to 10 ml and left in the dark for 1 hour for color development.

Subsequently, the absorbance at 665 nm was measured using an ultraviolet-visible spectrophotometer (UV-1800PC). The concentration of ammonia was determined by using the standard curve obtained by combining the absorbance measurements with a series of gradient concentrations of NH<sub>4</sub>Cl solutions (Fig. S1a-b).

### **Determination of NO<sub>2</sub><sup>-</sup>**

Obtain the concentration information of nitrite by using the Griess chromogenic reagent in conjunction with the colorimetric method. In order to obtain the concentration of nitrite ions in the electrolyte, 1 mL of the electrolyte in the cathode chamber was diluted 100 times. 1 mL of the 100-fold diluted electrolyte was taken and placed in a centrifuge tube. Then, 0.2 mL of Griess reagent (Composed of 50 mL deionized water, 4 g sulfonamide, 0.2 g N-(1-naphthyl) ethylenediamine dihydrochloride, and 10 mL phosphoric acid) was added, and the volume was adjusted to 10 mL. The solution was then exposed to light for 20 minutes for color development (Fig. S1c-d).

### **The Faradaic efficiency of NO<sub>3</sub>RR and NH<sub>3</sub> yield**

The Faraday efficiency of ammonia is calculated according to the following formula:

$$F_{\text{NH}_3} = (8 * F * c_{\text{NH}_3} * V) / (14 * Q)$$

Here, 8 represents that 1 mol of NO<sub>3</sub><sup>-</sup> reacting to form 1 mol NH<sub>3</sub> transfers 8 electrons. F is the Faraday constant (96500 C/mol), c<sub>NH<sub>3</sub></sub> represents the concentration of NH<sub>4</sub><sup>+</sup>, V represents the volume of the electrolyte at the cathode, 14 represents the

relative atomic mass of N, and Q represents the charge consumed during the electrolysis process.

The Faraday efficiency of  $\text{NO}_3^-$  to  $\text{NO}_2^-$  can be calculated by the following formula:

$$FE = (2 F \cdot C_{\text{NO}_2^-} \cdot V) / (14 \cdot Q)$$

Here, 2 indicates that during the reaction of 1 mol  $\text{NO}_3^-$ , 1 mol of  $\text{NO}_2^-$  is produced and 2 electrons are transferred. F represents Faraday's constant (96500 C/mol),  $C_{\text{NO}_2^-}$  represents the concentration of  $\text{NO}_2^-$ , V represents the volume of the anode electrolyte, 14 represents the mass of N, and Q represents the charge consumed during the electrolysis process.

## 2. Figures

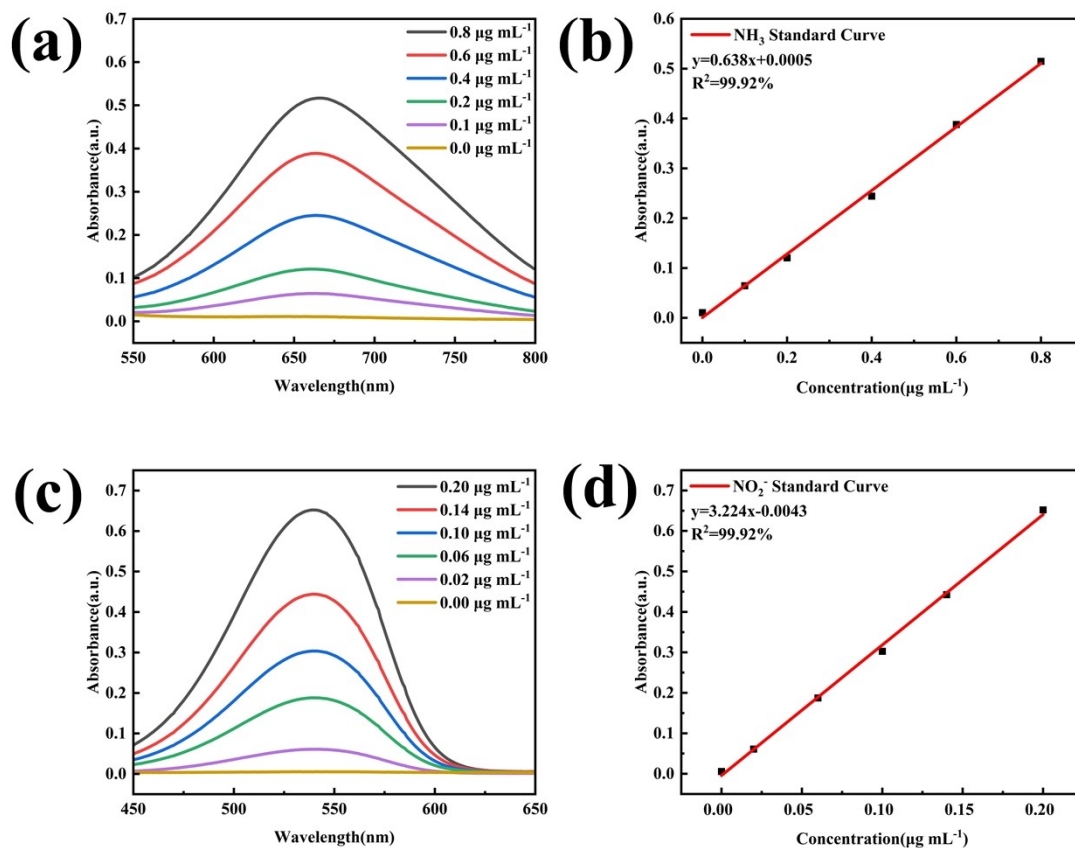

Fig. S1 (a) UV-vis absorption curves of  $\text{NH}_4\text{Cl}$  standard solutions. (b) Linear fitting results of the calibration curve. (c) UV-vis absorption curves of  $\text{NaNO}_2$  standard solutions. (d) Linear fitting results of the calibration curve.

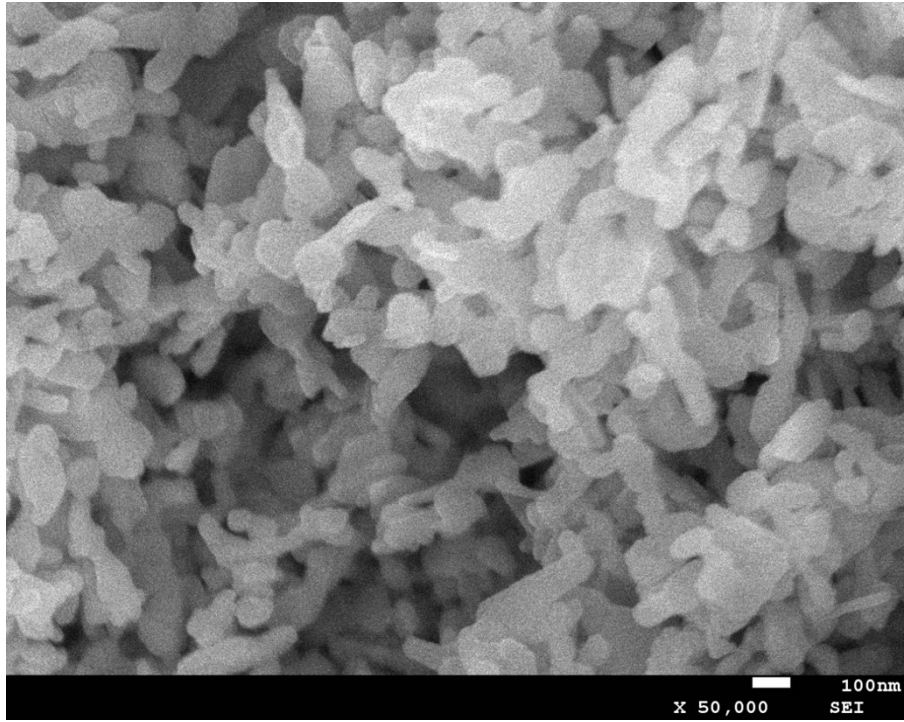

Fig. S2 SEM images of 0.1-Ni-CuO NP.

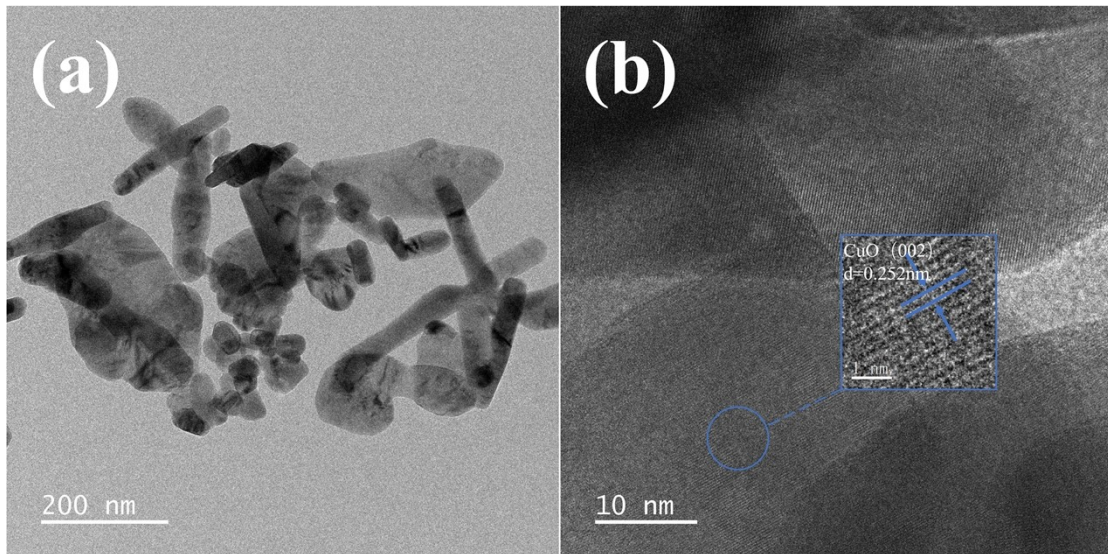

Fig. S3 (a) TEM images of CuO NP. (b) HRTEM images of CuO NP.

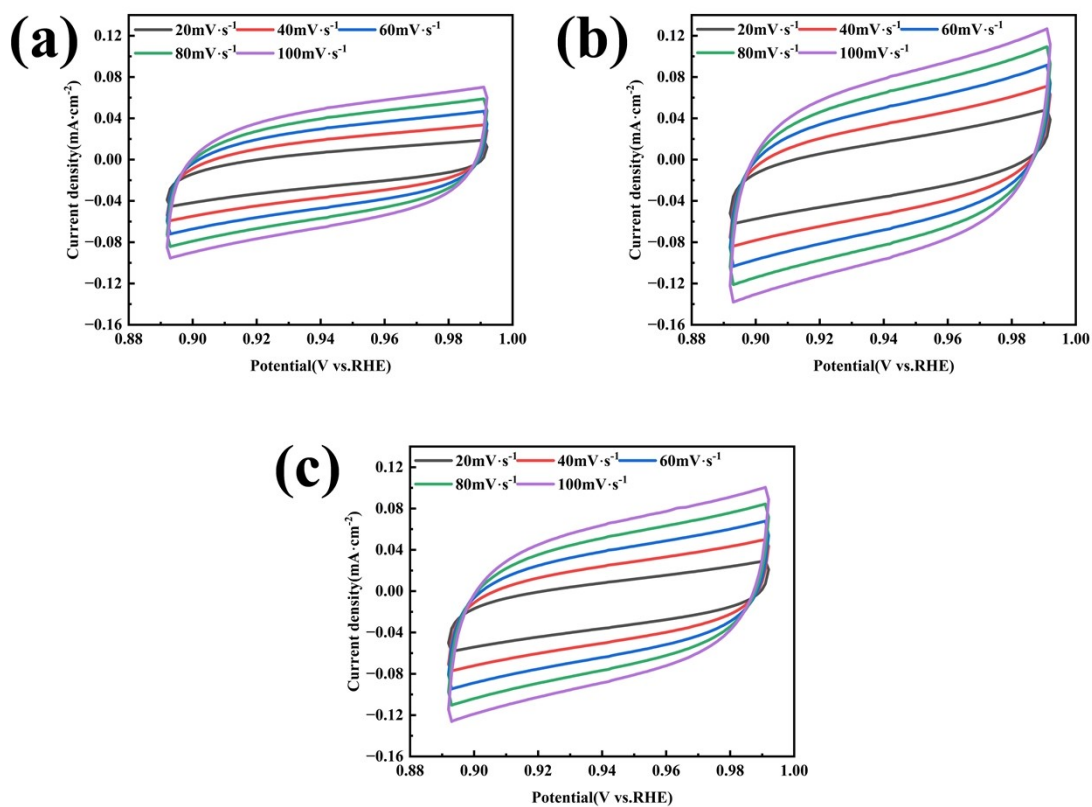

Fig. S4 Cyclic voltammograms (CV) of (a) 0.1-Ni-CuO NP, (b) CuO NP, (c) NiO NP at different scan rates from 20 to 100 mV s<sup>-1</sup>.

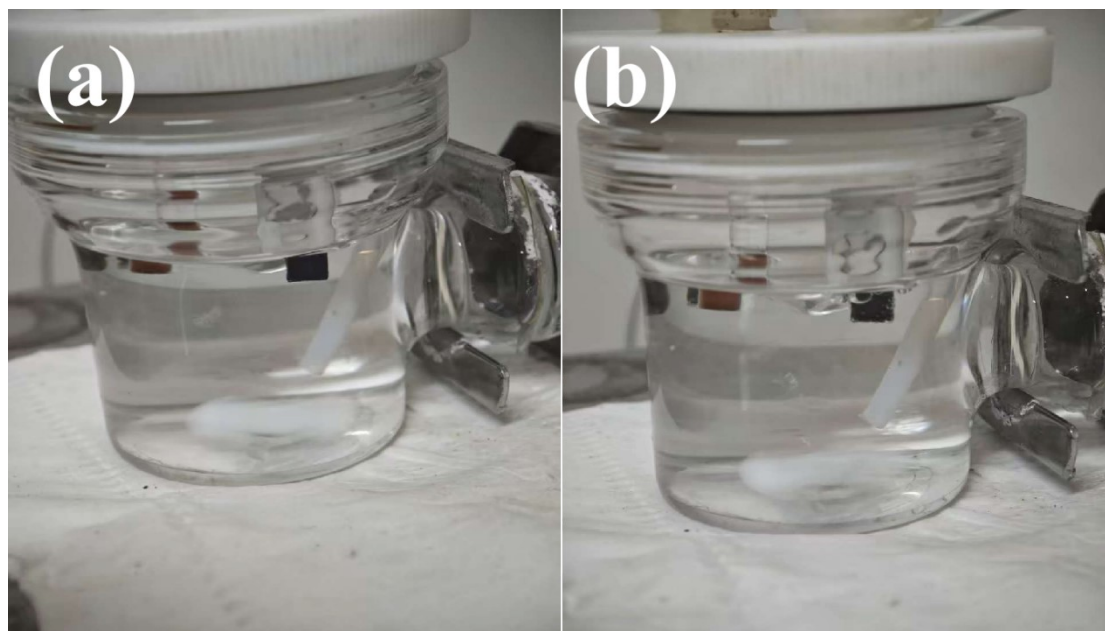

Fig. S5 The production of H<sub>2</sub> on (a) 0.1-Ni-CuO NP and (b) NiO NP.

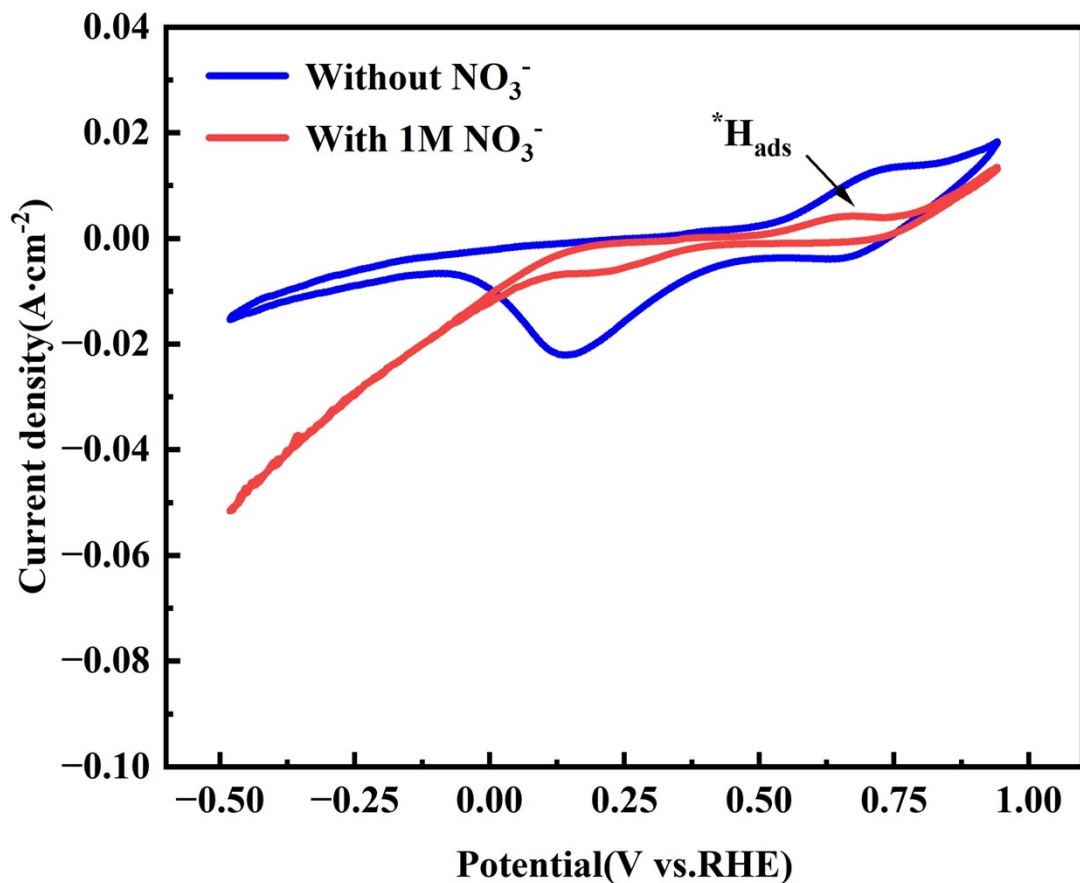

Fig. S6 CV tests of CuO NP at the working potential.

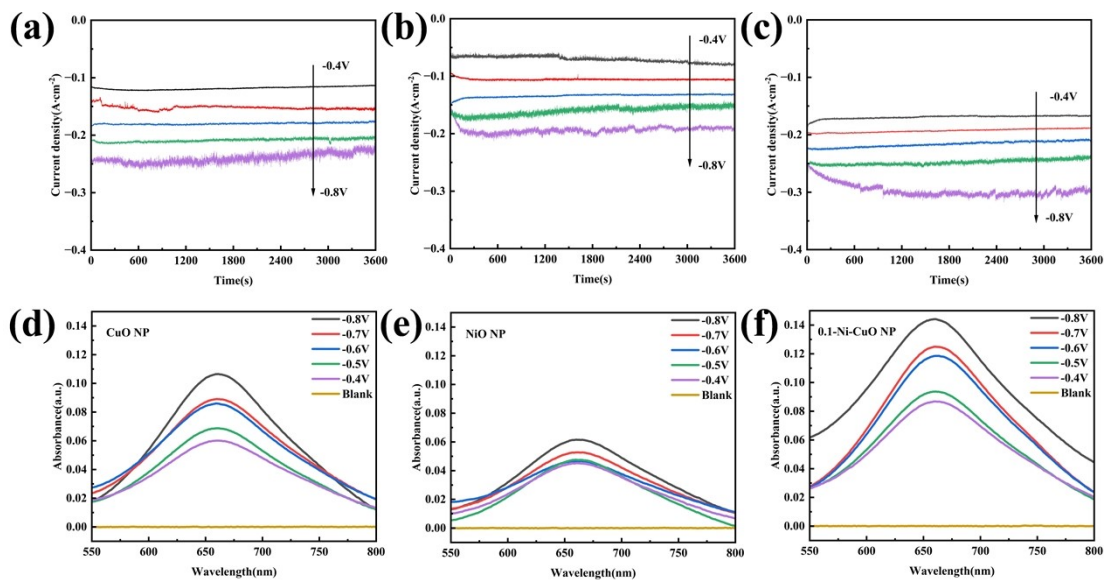

Fig. S7 (a)-(c) i-t curves of CuO NP, NiO NP, 0.1-Ni-CuO NP at different potentials,

(d)-(f) UV-vis absorption curves of electrolytes at different voltages.

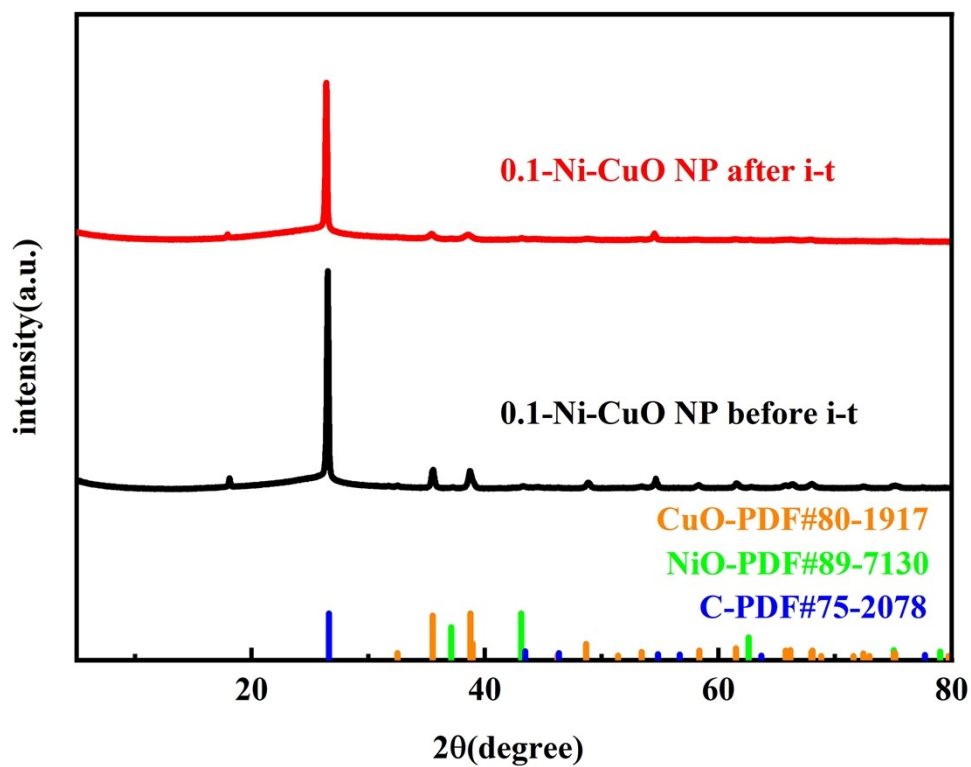

Fig. S8 XRD spectra of 0.1-Ni-CuO NP before and after  $\text{NO}_3\text{RR}$ .

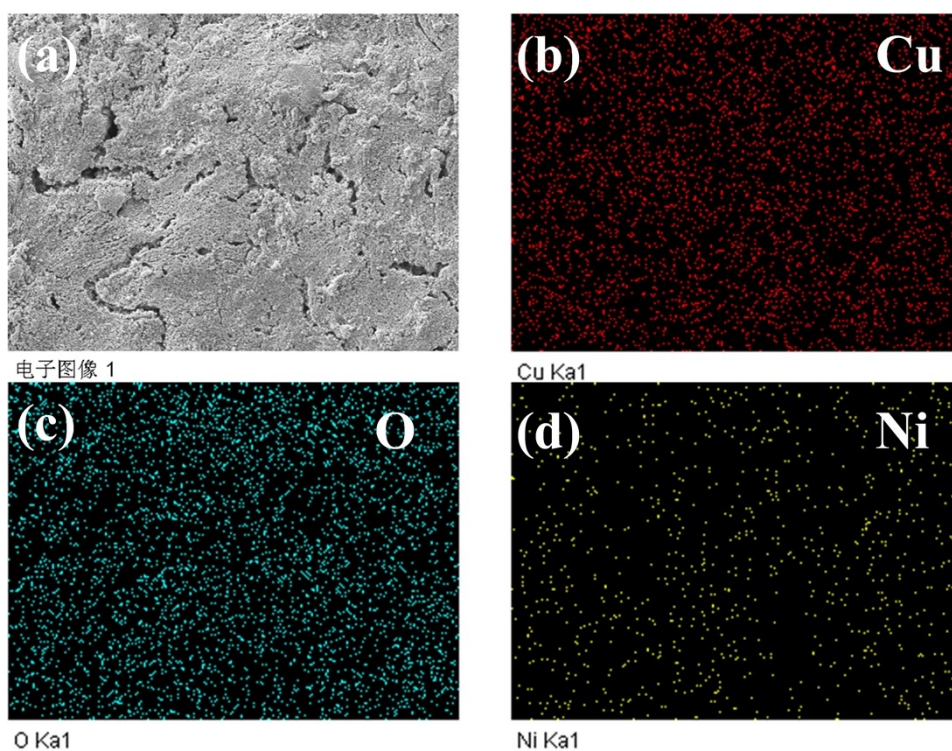

Fig. S9 (a) SEM image of 0.1-Ni-CuO NP after  $\text{NO}_3\text{RR}$ , (b)-(d) EDS image of 0.1-Ni-CuO NP after  $\text{NO}_3\text{RR}$ .

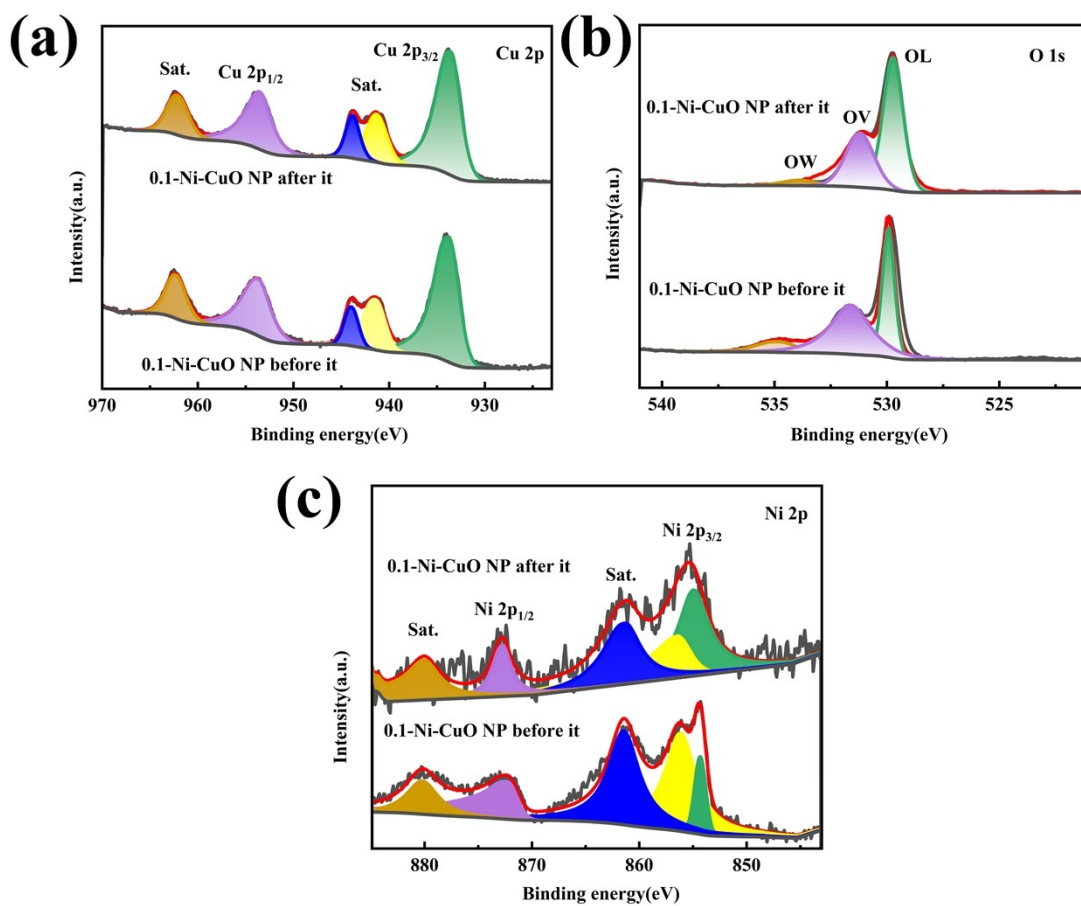

Fig. S10 High-resolution XPS spectra of (a) Cu 2p (b) O 1s (c) Ni 2p for 0.1-Ni-CuO NP before and after  $\text{NO}_3\text{RR}$ .

Tab. S1 The comparison of the NH<sub>3</sub> yields and FEs of 0.1-Ni-CuO NP with the reported catalysts for NO<sub>3</sub>RR.

| Catalyst                          | Electrolyte                                                          | FE(NH <sub>3</sub> ) (%) | NH <sub>3</sub> Yield                        | Ref.      |
|-----------------------------------|----------------------------------------------------------------------|--------------------------|----------------------------------------------|-----------|
| Cu nanoparticle                   | 10 mM KNO <sub>3</sub> ,<br>0.1 M KOH                                | 61%                      | 225.8 μg h <sup>-1</sup> cm <sup>-2</sup>    | 1         |
| Cu SAC                            | 0.1 M KNO <sub>3</sub> ,<br>0.1 M KOH                                | 84.70%                   | 0.26 mmol h <sup>-1</sup> cm <sup>-2</sup>   | 2         |
| dr-Cu-NPs                         | 0.5 M K <sub>2</sub> SO <sub>4</sub> ,<br>50 ppm KNO <sub>3</sub>    | 81.99%                   | 781.25 μg h <sup>-1</sup> mg <sup>-1</sup>   | 3         |
| Cu-incorporated PTCDA             | 0.1 mMPBS,<br>36 mMNO <sub>3</sub> <sup>-</sup>                      | 77%                      | 0.0256 mmol h <sup>-1</sup> cm <sup>-2</sup> | 4         |
| Cu3Pd1                            | 0.5 M K <sub>2</sub> SO <sub>4</sub> ,<br>50 ppm KNO <sub>3</sub> -N | 90.02%                   | 784.37 mg cm <sup>-2</sup> mg <sup>-1</sup>  | 5         |
| Ag <sub>20</sub> Cu <sub>12</sub> | 0.5 M Na <sub>2</sub> SO <sub>4</sub> ,<br>500 ppm NaNO <sub>3</sub> | 84.60%                   | 0.138 mmol h <sup>-1</sup> mg <sup>-1</sup>  | 6         |
| Cu/CuAu ordered SAA               | 1 M KOH,<br>1 M KNO <sub>3</sub>                                     | 85.50%                   | 8.47 mol g <sup>-1</sup> h <sup>-1</sup>     | 7         |
| np-CuCo                           | 1 M KOH,<br>200 ppm NO <sub>3</sub>                                  | 85.20%                   | 275.9 μmol h <sup>-1</sup> cm <sup>-2</sup>  | 8         |
| Cu <sub>2</sub> O@Pd              | 0.1 M NaOH,<br>0.01 M NaNO <sub>3</sub>                              | 81.20%                   | 1.08 mg h <sup>-1</sup> cm <sup>-2</sup>     | 9         |
| CuNi/OMC                          | 0.1 M PBS,<br>500 ppm KNO <sub>3</sub>                               | 78.90%                   | 2.37 mg cm <sup>-2</sup> h <sup>-1</sup>     | 10        |
| 0.1-Ni-CuO NP                     | 0.1 M NaNO <sub>3</sub> ,<br>1 M NaOH                                | 90.60%                   | 1.065 mmol·h <sup>-1</sup> ·cm <sup>-2</sup> | This work |

## References

- 1 X. Fu, X. Zhao, X. Hu, K. He, Y. Yu, T. Li, Q. Tu, X. Qian, Q. Yue, M. R. Wasielewski and Y. Kang, *Applied Materials Today*, 2020, **19**, 100620.
- 2 J. Yang, H. Qi, A. Li, X. Liu, X. Yang, S. Zhang, Q. Zhao, Q. Jiang, Y. Su, L. Zhang, J.-F. Li, Z.-Q. Tian, W. Liu, A. Wang and T. Zhang, *J. Am. Chem. Soc.*, 2022, **144**, 12062–12071.
- 3 Y. Xu, M. Wang, K. Ren, T. Ren, M. Liu, Z. Wang, X. Li, L. Wang and H. Wang, *J. Mater. Chem. A*, 2021, **9**, 16411–16417.
- 4 G.-F. Chen, Y. Yuan, H. Jiang, S.-Y. Ren, L.-X. Ding, L. Ma, T. Wu, J. Lu and H. Wang, *Nat Energy*, 2020, **5**, 605–613.
- 5 Y. Xu, K. Ren, T. Ren, M. Wang, M. Liu, Z. Wang, X. Li, L. Wang and H. Wang, *Chem. Commun.*, 2021, **57**, 7525–7528.

- 6 G. Ma, F. Sun, L. Qiao, Q. Shen, L. Wang, Q. Tang and Z. Tang, *Nano Res.*, 2023, **16**, 10867–10872.
- 7 Q. Gao, B. Yao, H. S. Pillai, W. Zang, X. Han, Y. Liu, S.-W. Yu, Z. Yan, B. Min, S. Zhang, H. Zhou, L. Ma, H. Xin, Q. He and H. Zhu, *Nat. Synth*, 2023, **2**, 624–634.
- 8 X. Zhou, W. Xu, Y. Liang, H. Jiang, Z. Li, S. Wu, Z. Gao, Z. Cui and S. Zhu, *ACS Catal.*, 2024, **14**, 12251–12259.
- 9 F. Dou, F. Guo, B. Li, K. Zhang, N. Graham and W. Yu, *Journal of Hazardous Materials*, 2024, **472**, 134522.
- 10 J. Zhao, L. Liu, Y. Yang, D. Liu, X. Peng, S. Liang and L. Jiang, *ACS Sustainable Chem. Eng.*, 2023, **11**, 2468–2475.
